# Supplementary material
Source: PubMed Central journal article supplement (PMC2504774)
Supplement: 0801290105_0801290105SI.pdf [file 0801290105_0801290105SI.pdf]

# Supporting Information

Reda *et al.* 10.1073/pnas.0801290105

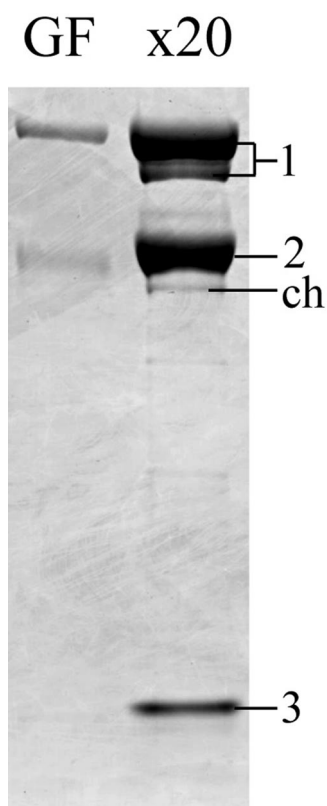

**Fig. S1.** Analysis of the protein composition of purified FDH1 by SDS/PAGE. GF, protein solution after the final gel filtration step;  $\times 20$ , same solution concentrated 20-fold. Band 1, 97.8-kDa subunit (sequences gi|116750131 and 116750132); band 2, 65.8-kDa subunit (gi|116750130); ch, minor contaminant identified as a chaperonin that is highly homologous to GroEL from *Escherichia coli* (gi|116747572); band 3, 16.6-kDa subunit (gi|116750129). Proteins were identified by tandem mass spectrometry, using Mascot ([www.matrixscience.com](http://www.matrixscience.com)) to search the NCBI nr database. The search tolerance was 70 ppm, and the peptides detected typically scored above the individual ion score threshold (41 points, representing  $P < 0.05$ ). The highest individual ion scores were 140, 93, 133, and 66 for 1, 2, 3, and ch, respectively, and the cumulative ion scores for 1–3 were exceptional. Conditions: 4–12% NuPAGE BisTris polyacrylamide gel with Mops/SDS running buffer (Invitrogen), stained with Coomassie blue.
